# Supplementary material
Source: PubMed Central journal article supplement (PMC5503716)
Supplement: supp_fj.201700043R_Supplemental_Data.pdf [file supp_fj.201700043R_Supplemental_Data.pdf]

## Supplementary Data for

Modeled structural basis for the recognition of  $\alpha$ 2-3-sialyllactose by soluble klotho  
by Jon D. Wright et al.

**Supplementary Table S1.** Pairwise sequence alignment between the PDB structures containing  $\alpha$ 2-3-sialyllactose and the klotho KL1 and KL2 domains.<sup>a</sup>

|      | N <sup>b</sup> | 1s0i    | 1z4x    | 4c1w    | 4wvw   | 4yz5    | KL1     | KL2     |
|------|----------------|---------|---------|---------|--------|---------|---------|---------|
| 1s0i | 642            |         | 107/22% | 161/19% | 48/21% | 185/22% | 87/23%  | 175/20  |
| 1z4x | 456            | 110/22% |         | 37/32%  | 19/38% | 74/26%  | 71/21%  | 64/26%  |
| 4c1w | 196            | 159/19% | 33/32%  |         | 22/27% | 183/27% | 53/21%  | 41/24%  |
| 4wvw | 152            | 47/21%  | 21/38%  | 21/27%  |        | 52/24%  | 30/33%  | 43/21%  |
| 4yz5 | 665            | 181/21% | 65/26%  | 181/27% | 58/24% |         | 80/22%  | 68/20%  |
| KL1  | 450            | 80/23%  | 70/21%  | 55/21%  | 28/33% | 74/22%  |         | 450/33% |
| KL2  | 439            | 167/21% | 60/26%  | 42/24%  | 45/21% | 74/20%  | 439/33% |         |

<sup>a</sup>Each pair of sequences was aligned using the Lalign program (X. Huang and W. Miller (1991) Adv. Appl. Math. 12:373-381). The entries in column 3 to 9 correspond to the maximum number of residues in the template sequence that was aligned with the target sequence followed by the percentage sequence identity of the longest aligned amino acid sequence; e.g., in the 2<sup>nd</sup> row and 4<sup>th</sup> column, 107 denotes that a maximum of 107 out of 642 residues in 1s0i template sequence was aligned with the 1z4x protein sequence and 22% denotes the sequence identity of the longest aligned amino acid sequence.

<sup>b</sup>N is the total number of amino acid residues in the template protein.

**Supplementary Figure S1.**

**A**

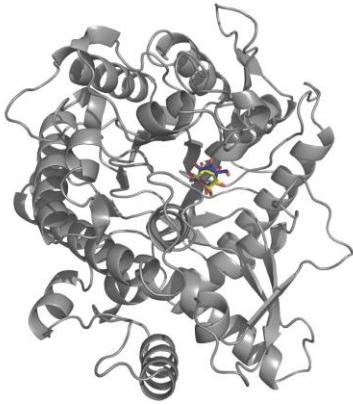

**B**

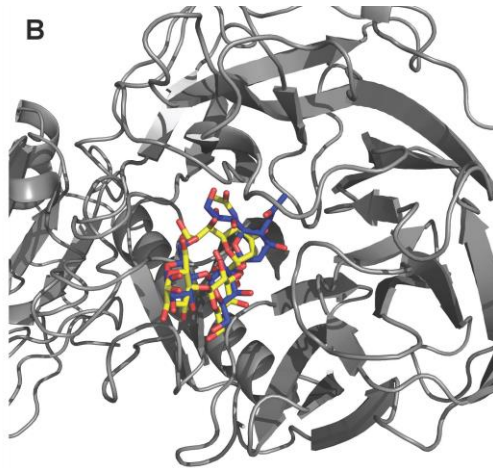

**Supplementary Figure S1.** (A) Comparison of the top-ranked docked glucose configuration (yellow) with the X-ray structure (PDB entry 2e91) of glucose (dark blue) bound to KLRP (grey). (B) Comparison of the top-ranked docked  $\alpha$ 2-3-sialyllactose configuration (yellow) with the X-ray structure (PDB entry 1s0i) of  $\alpha$ 2-3-sialyllactose (dark blue) bound to *Trypanosoma cruzi* trans-sialidase (grey).
